# Supplementary material for: Research to action to address inequities: the experience of the Cape Town Equity Gauge
Source: Springer Nature journal article supplement (doi:10.1186/1475-9276-7-6), 2008-02-04
Supplement: Additional file 2 [file 1475-9276-7-6-s2.doc]

# Research to action to address inequities: the experience of the Cape Town equity gauge

## Showing inequities and the mismatch of resource allocation
